# Supplementary material for: The immunosuppressive effects and mechanisms of loureirin B on collagen-induced arthritis in rats
Source: Frontiers journal article supplement (doi:10.3389/fimmu.2023.1094649), 2023-04-24
Supplement: Data_Sheet_1.pdf [file Data_Sheet_1.pdf]

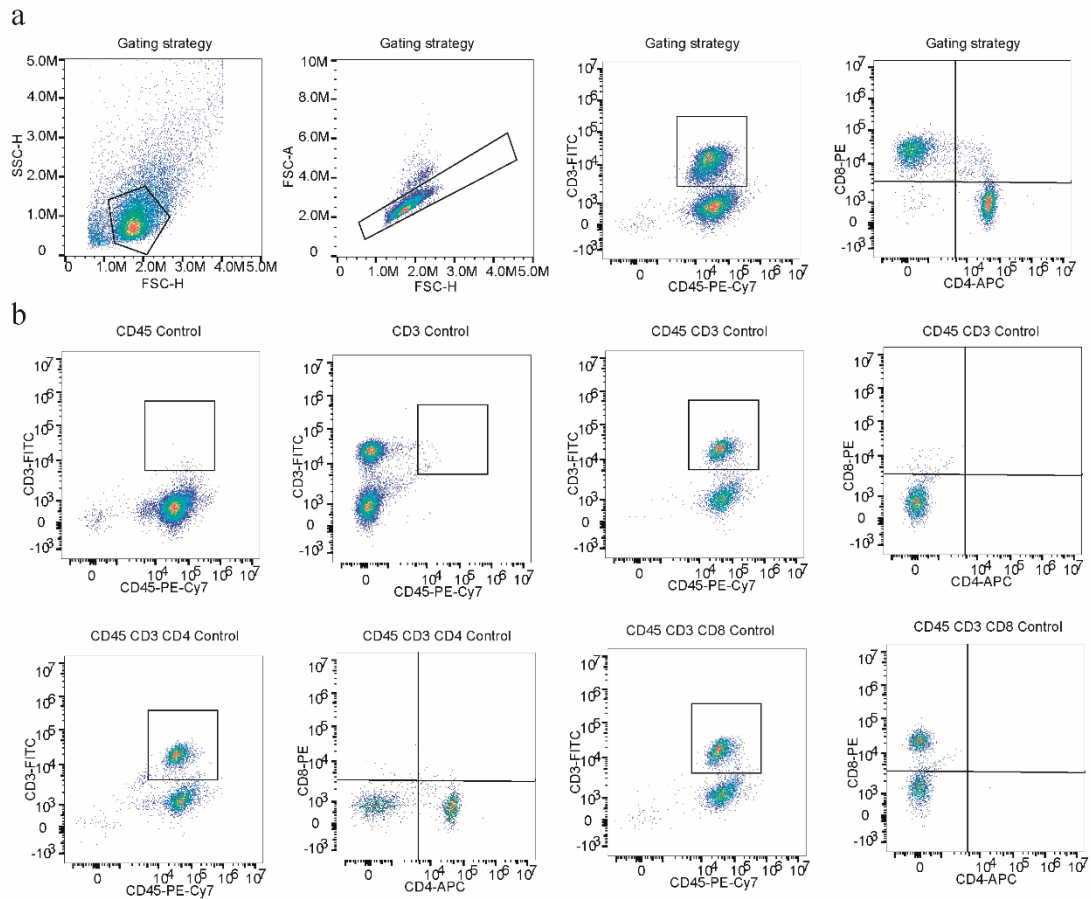

**Supplementary figure1. Gating strategy and FMO control of T-cell subtype flow cytometry in spleen cells.**

A. Gating strategy of T-cell subtype flow cytometry in spleen cells. B. FMO control of T-cell subtype flow cytometry in spleen cells.

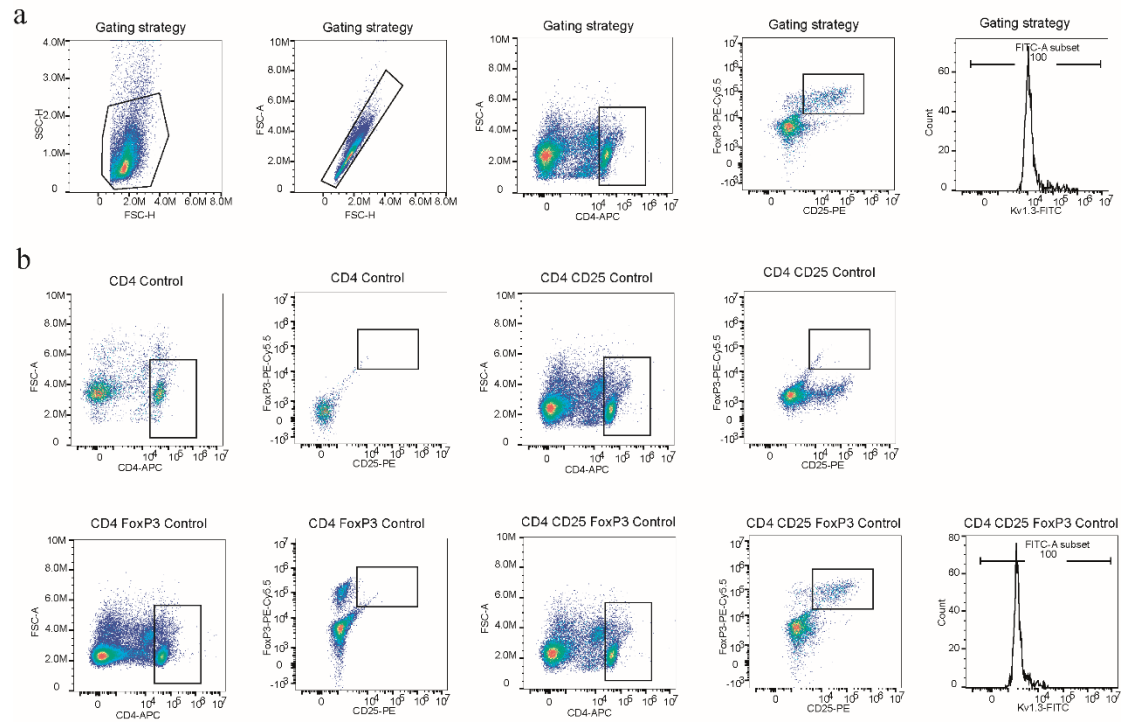

**Supplementary figure2. Gating strategy and FMO control of regulatory T cell**

**flow cytometry in spleen cells.**

A. Gating strategy of regulatory T cell flow cytometry in spleen cells. B. FMO control of regulatory T cell flow cytometry in spleen cells.
